# Supplementary material
Source: PubMed Central journal article supplement (PMC1544094)

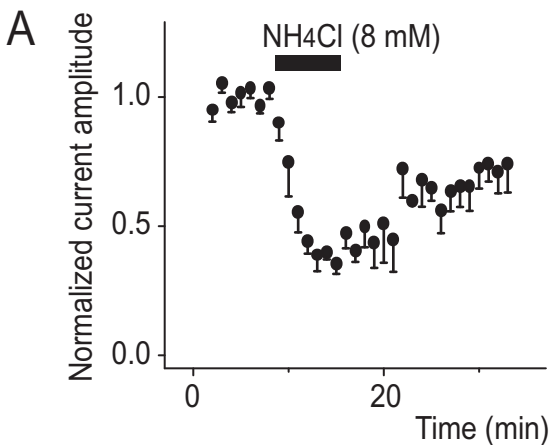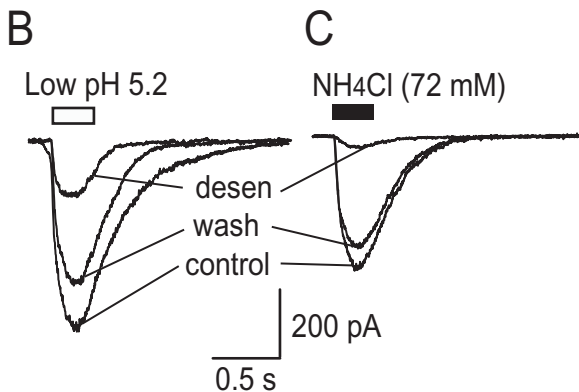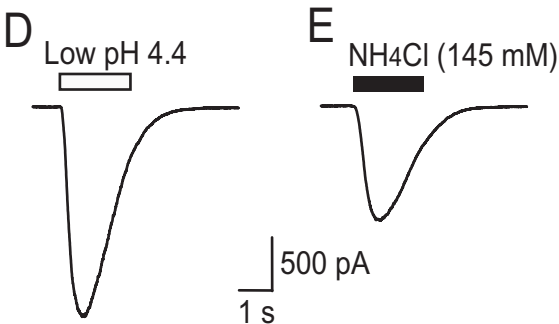

Supplement: pnas_0600768103_1.pdf [file pnas_0600768103_1.pdf]

NH<sub>4</sub>Cl (32 mM)

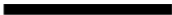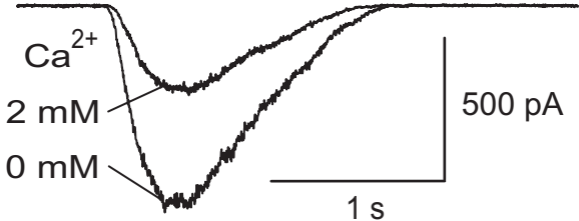

Supplement: pnas_0600768103_2.pdf [file pnas_0600768103_2.pdf]
